# Supplementary material for: Carbon nanohorns allow acceleration of osteoblast differentiationviamacrophage activation
Source: Royal Society of Chemistry journal article supplement (doi:10.1039/c6nr02756c), 2016-01-01
Supplement: c6nr02756c1.pdf [file c6nr02756c1.pdf]

Table S1  
The list of the primers for real time polymerase chain reaction

| gene name                                                                                 | symbol | forward sequence         | reverse sequence        |
|-------------------------------------------------------------------------------------------|--------|--------------------------|-------------------------|
| Homo sapiens glyceraldehyde-3-phosphate dehydrogenase (GAPDH), transcript variant 1, mRNA | GAPDH  | GCACCGTCAAGGCTGAGAAC     | TGGTGAAGACGCCAGTGGA     |
| Homo sapiens chemokine (C-X-C motif) ligand 12 (CXCL12), transcript variant 1, mRNA       | CXCL12 | TTGTGATTGCCTCTGAAGCCTATG | ATTGGAACCTGAAACCCCTGCTG |
| Homo sapiens chemokine (C-C motif) ligand 3 (CCL3), mRNA                                  | CCL3   | CTGCTCAGAATCATGCAGGTC    | ACTGGCTGCTCGTCTCAAAG    |
| Homo sapiens chemokine (C-C motif) ligand 4 (CCL4), mRNA                                  | CCL4   | CAAGTCTGTGCTGATCCCAGTG   | GCAGCTCAGTTCAGTTCCAGGTC |

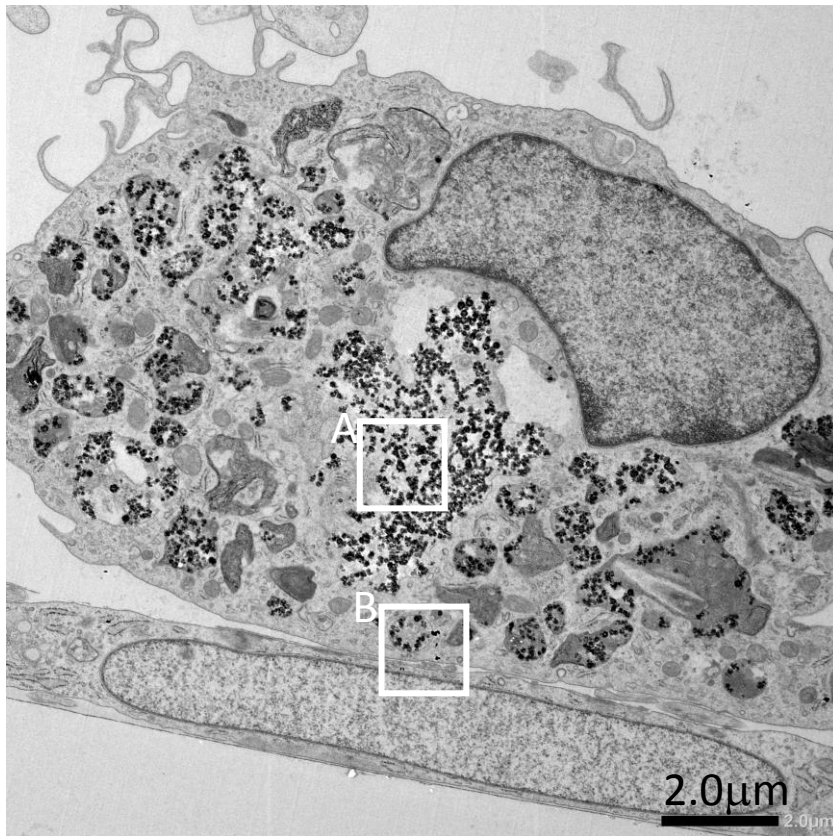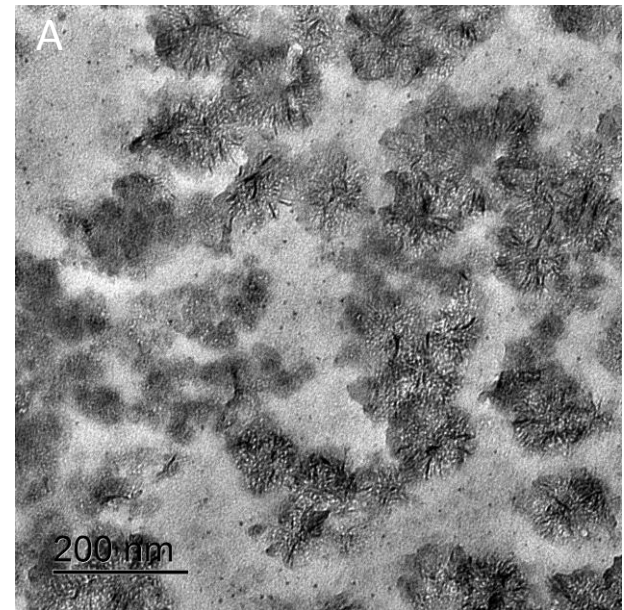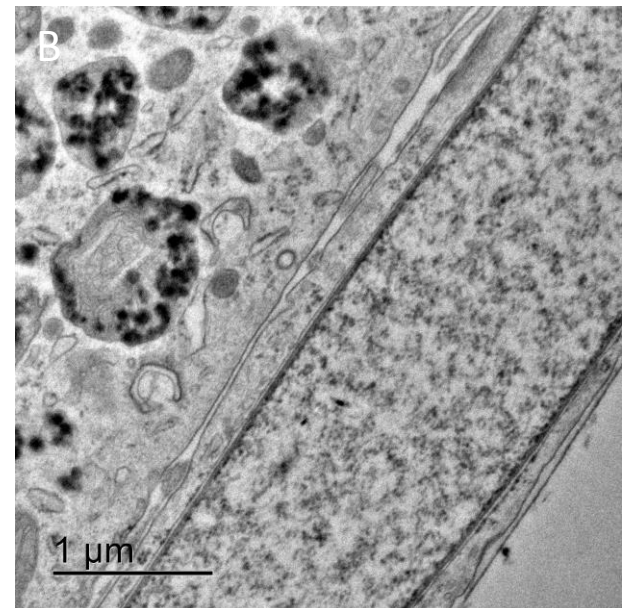

Fig. S1  
TEM observations of cocultures with CNHs for 7 days.

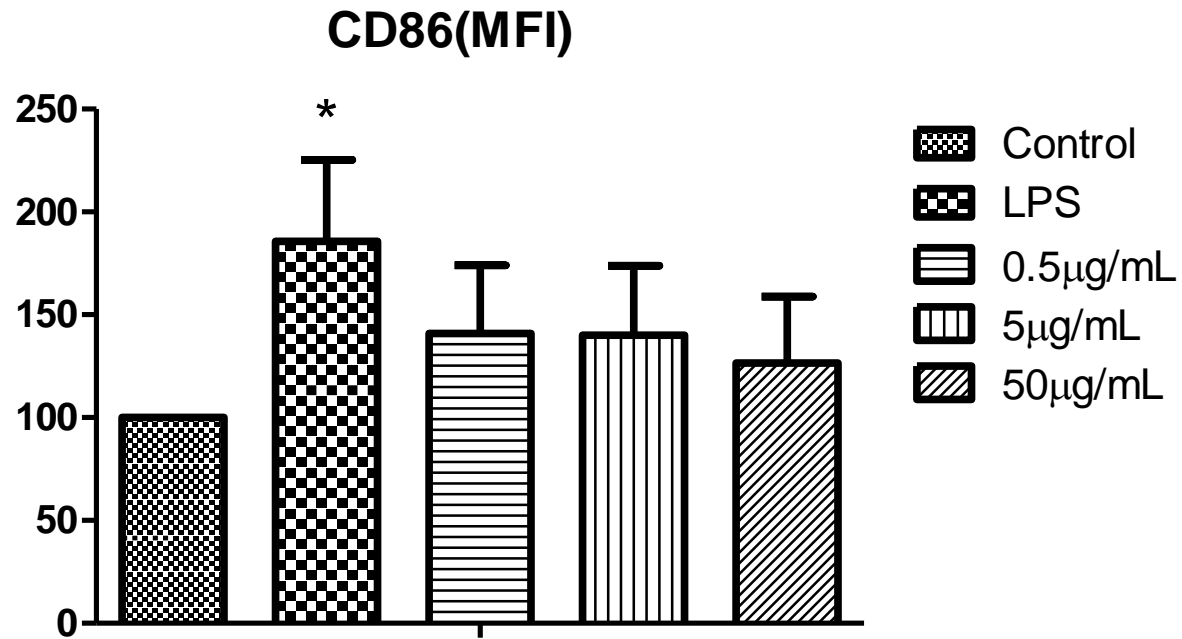

Fig. S2 Flow cytometry analysis of CD86 expression in hMDM exposed to different concentrations of CNHs. The two-way ANOVA followed by the Bonferroni's post-test was performed to determine the statistical differences versus control cells and to compare the three CNH samples with each other (\* $p < 0.005$ ).
